# Supplementary material for: Recruitment into stress granules prevents irreversible aggregation of FUS protein mislocalized to the cytoplasm
Source: PubMed Central journal article supplement — Cell Cycle. 2013 Sep 4;12(19):3194–202. doi: 10.4161/cc.26241 (PMC3865015; doi:10.4161/cc.26241), 2013-09-04
Supplement: cc-12-3194-s01.pdf [file cc-12-3194-s01.pdf]

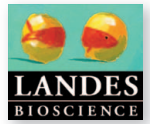

## **Supplemental Material to:**

**Tatyana A Shelkovernikova, Hannah Robinson, Natalie Connor-Robson, and Vladimir L Buchman**

**Recruitment into stress granules prevents irreversible aggregation of FUS protein mislocalized to the cytoplasm**

**Cell Cycle 2013; 12(19)**

**<http://dx.doi.org/10.4161/cc.26241>**

**<http://www.landesbioscience.com/journals/cc/article/26241>**

no primary

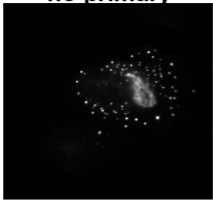

primary

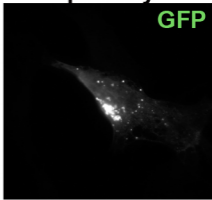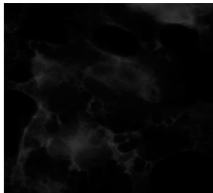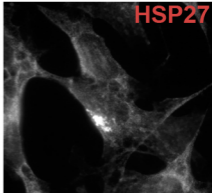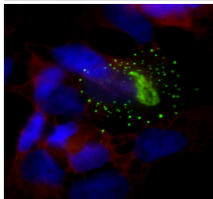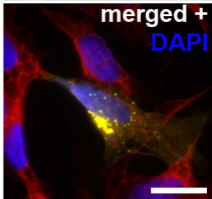

**A** heat shock

FUS-GFP

TIAR

merged

FUS 1-513

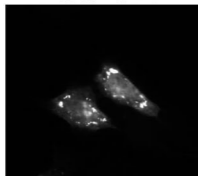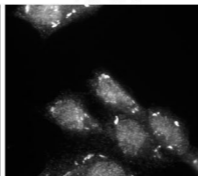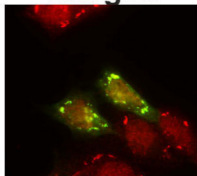

FUS 1-359

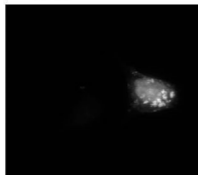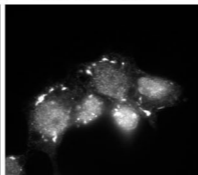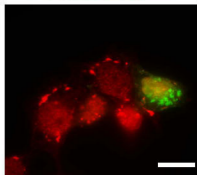**B** heat shock + emetine

FUS-GFP

TIAR

merged

FUS 1-513

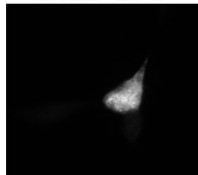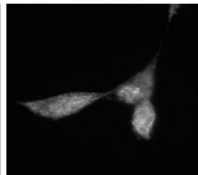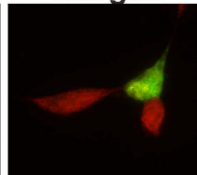

FUS 1-359

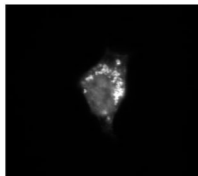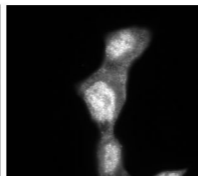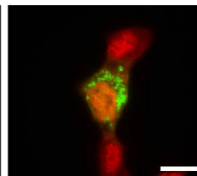

FUS 522G

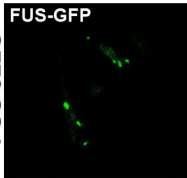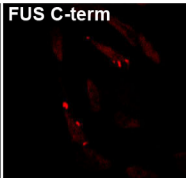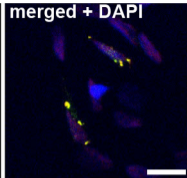

FUS 1-359

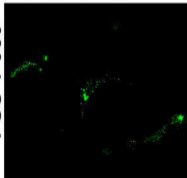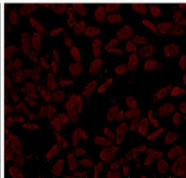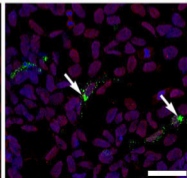

## **Supplementary Video and Figure Legends**

### **Video S1. Formation of small cytoplasmic aggregates of the FUS 1-359 protein.**

Multiple small aggregates of GFP-FUS 1-359 protein (green) are formed throughout the cytoplasm of cells few hours after transfection with a corresponding plasmid.

Time-lapse microscopy using Leica TCS SP2 MP confocal microscope (Fluotar L 63x0.70 oil objective). A sequence of images taken with 8 min intervals over a period of approximately 4 hours was further transformed into a movie using Leica Application Suite AF software.

### **Video S2. Fusion and translocation of small cytoplasmic aggregates of the FUS 1-359 protein.**

Large juxtannuclear aggresome is formed by fusion of smaller aggregates (appearing as a small round puncta) initially dispersed throughout the cytoplasm of cells expressing GFP-FUS 1-359 protein (green) after transient transfection of SH-SY5Y cells with a corresponding plasmid. Time-lapse microscopy using Leica TCS SP2 MP confocal microscope (Fluotar L 63x0.70 oil objective). A sequence of images taken with 8 min intervals over a period of approximately 4 hours was further transformed into a movie using Leica Application Suite AF software.

**Fig. S1. Large perinuclear structures formed by FUS 1-359 are positive for small chaperone HSP27, a typical constituent of aggresome.** Control immunostaining in the absence of primary anti-HSP27 antibody (left panels) demonstrates that the observed signal in the red channel (right panels) is not due to the bleeding-through of green GFP fluorescence.

**Fig. S2. Truncated FUS 1-359 is not recruited into stress granules upon heat shock.** FUS 1-513 but not FUS 1-359 is recruited into TIAR-positive stress granules upon heat shock (43°C for 1 hour) (A) and heat shock induced stress granules containing FUS 1-513 are dissipated upon concurrent emetine treatment, while FUS 1-359 aggregates remain intact (B). Scale bars: 20  $\mu\text{m}$  for all panels.

**Fig. S3. Antibody against C-terminal epitope of FUS does not detect FUS 1-359 and therefore can be used for specific localization of full-length variants in co-transfection experiments.** FUS R522G but not FUS 1-359 (arrows) expressed in SH-SY5Y neuroblastoma cells are recognized by an antibody against C-terminus of FUS. Scale bar: 35  $\mu\text{m}$  the top and 45  $\mu\text{m}$  for the bottom panel.
